# Supplementary material for: Induction of Reactive Bone Stromal Fibroblasts in 3D Models of Prostate Cancer Bone Metastases
Source: MDPI journal article supplement (doi:10.3390/biology12060861), 2023-06-15
Supplement: s1 [file s1]

Supplementary Figure S1:

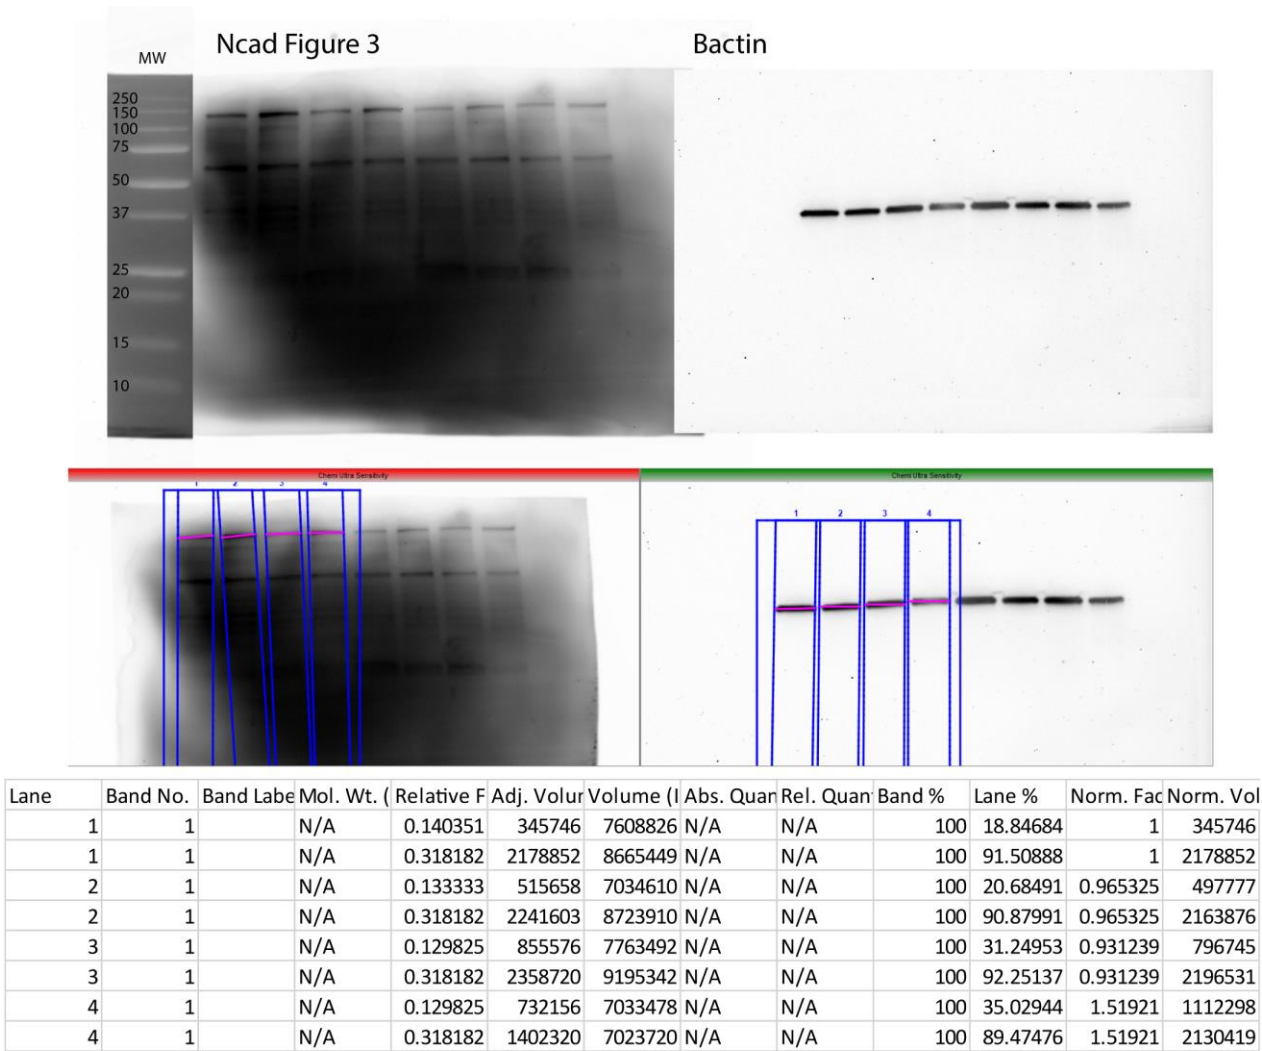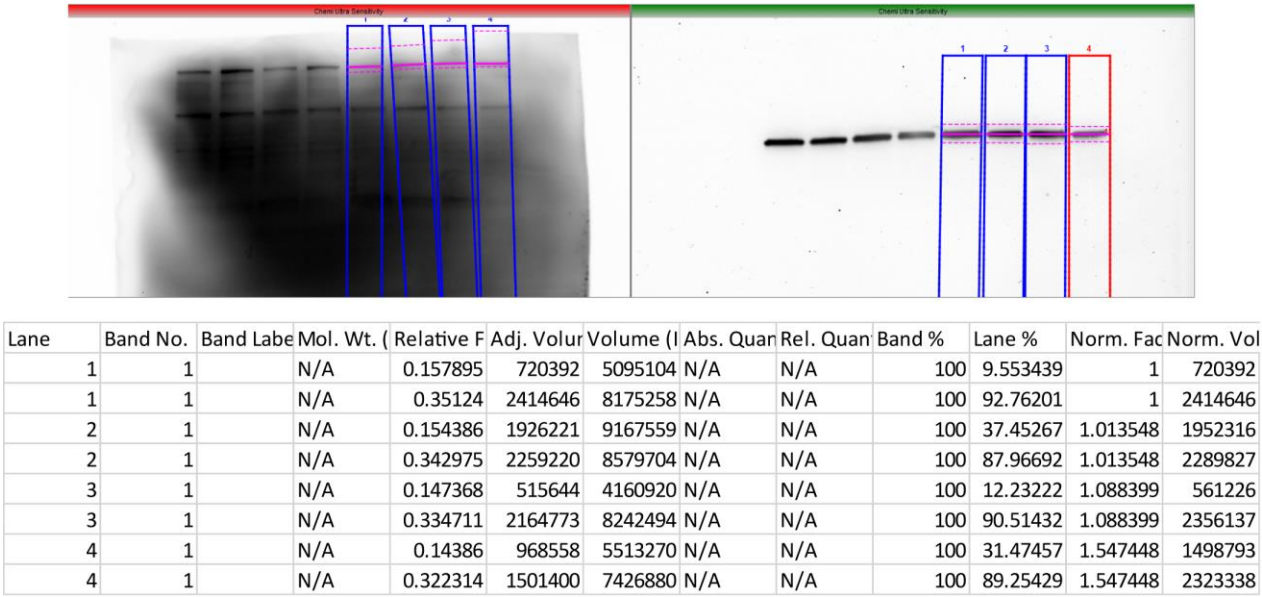

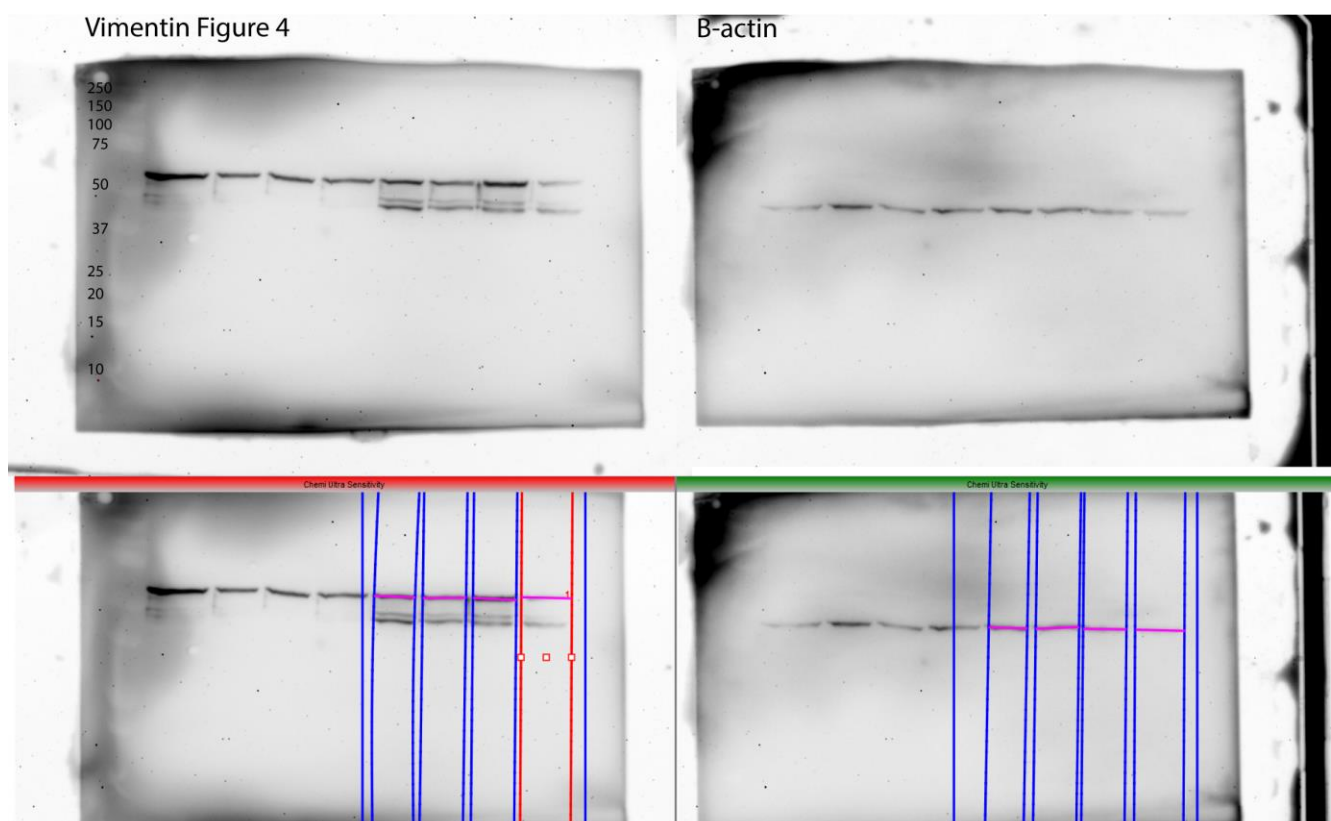

| Lane | Band No. | Band Label | Mol. Wt. (kDa) | Relative F | Adj. Volur | Volume (l) | Abs. Quan | Rel. Quan | Band % | Lane %   | Norm. Fac | Norm. Vol |
|------|----------|------------|----------------|------------|------------|------------|-----------|-----------|--------|----------|-----------|-----------|
| 1    | 1        |            | N/A            | 0.355301   | 1503310    | 4915380    | N/A       | N/A       | 100    | 18.84087 | 1         | 1503310   |
| 1    | 1        |            | N/A            | 0.429799   | 397344     | 1683712    | N/A       | N/A       | 100    | 12.23639 | 1         | 397344    |
| 2    | 1        |            | N/A            | 0.358166   | 1260576    | 4514400    | N/A       | N/A       | 100    | 18.67361 | 0.830832  | 1047326   |
| 2    | 1        |            | N/A            | 0.429799   | 437148     | 1863828    | N/A       | N/A       | 100    | 11.1848  | 0.830832  | 363196    |
| 3    | 1        |            | N/A            | 0.361032   | 2017584    | 5742864    | N/A       | N/A       | 100    | 21.70868 | 0.957181  | 1931192   |
| 3    | 1        |            | N/A            | 0.432665   | 255060     | 1491948    | N/A       | N/A       | 100    | 7.518358 | 0.957181  | 244138    |
| 4    | 1        |            | N/A            | 0.358166   | 484386     | 2774856    | N/A       | N/A       | 100    | 9.057567 | 0.742568  | 359689    |
| 4    | 1        |            | N/A            | 0.43553    | 169084     | 1239061    | N/A       | N/A       | 100    | 3.866564 | 0.742568  | 125556    |

3

4

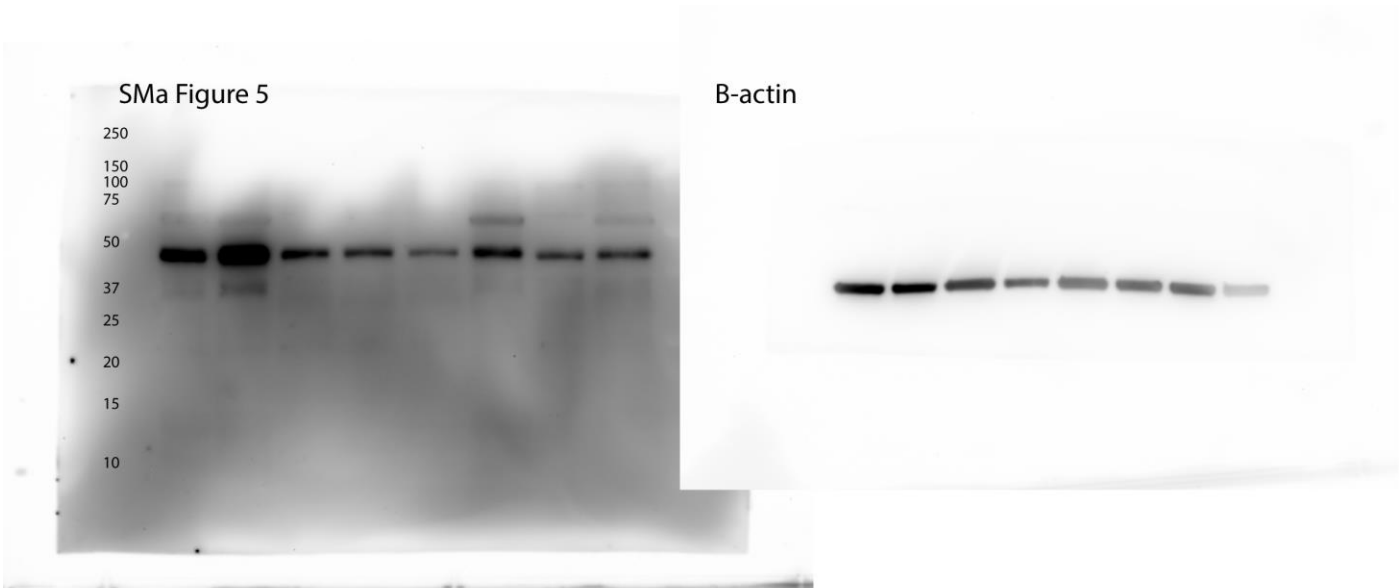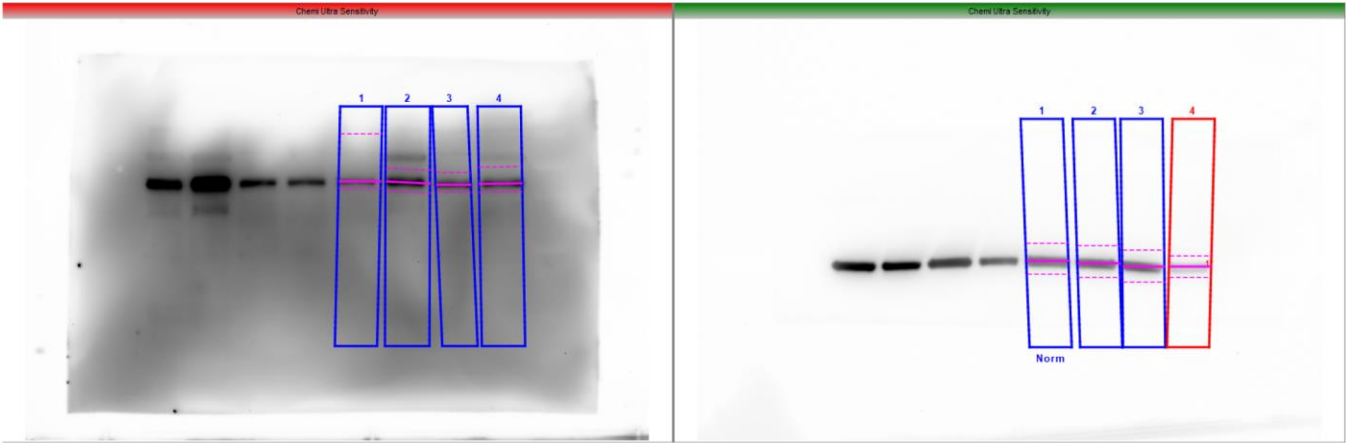

| Lane | Band No. | Band Label | Mol. Wt. (kDa) | Relative F | Adj. Volur | Volume (L) | Abs. Quan | Rel. Quan | Band % | Lane %   | Norm. Fac | Norm. Vol |
|------|----------|------------|----------------|------------|------------|------------|-----------|-----------|--------|----------|-----------|-----------|
| 1    | 1        |            | N/A            | 0.312796   | 8365034    | 50225946   | N/A       | N/A       | 100    | 86.78305 | 1         | 8365034   |
| 1    | 1        |            | N/A            | 0.621891   | 3775073    | 4847962    | N/A       | N/A       | 100    | 92.29719 | 1         | 3775073   |
| 2    | 1        |            | N/A            | 0.317536   | 8545797    | 37250577   | N/A       | N/A       | 100    | 50.00445 | 1.021192  | 8726896   |
| 2    | 1        |            | N/A            | 0.631841   | 3728638    | 4823542    | N/A       | N/A       | 100    | 93.09376 | 1.021192  | 3807654   |
| 3    | 1        |            | N/A            | 0.327014   | 4918243    | 23514151   | N/A       | N/A       | 100    | 68.37814 | 1.028785  | 5059815   |
| 3    | 1        |            | N/A            | 0.646766   | 3687790    | 4771520    | N/A       | N/A       | 100    | 92.75856 | 1.028785  | 3793943   |
| 4    | 1        |            | N/A            | 0.322275   | 6611392    | 35044208   | N/A       | N/A       | 100    | 39.99568 | 2.906605  | 19216704  |
| 4    | 1        |            | N/A            | 0.646766   | 1250711    | 2029931    | N/A       | N/A       | 100    | 88.88042 | 2.906605  | 3635322   |

Figure 6 TGF B R1

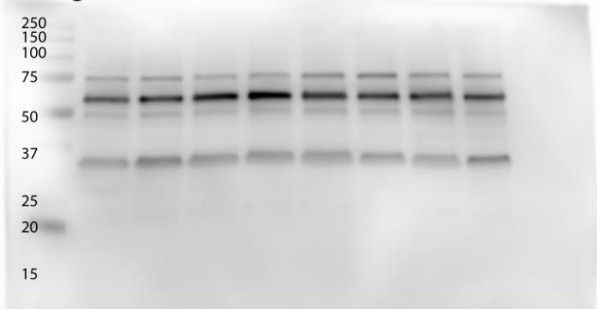

B-actin

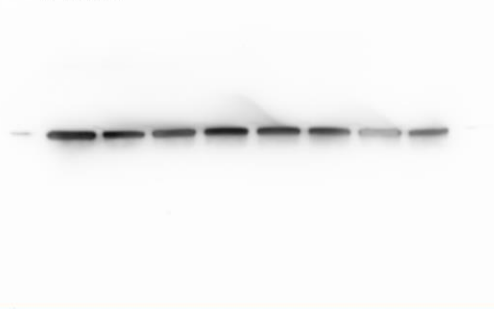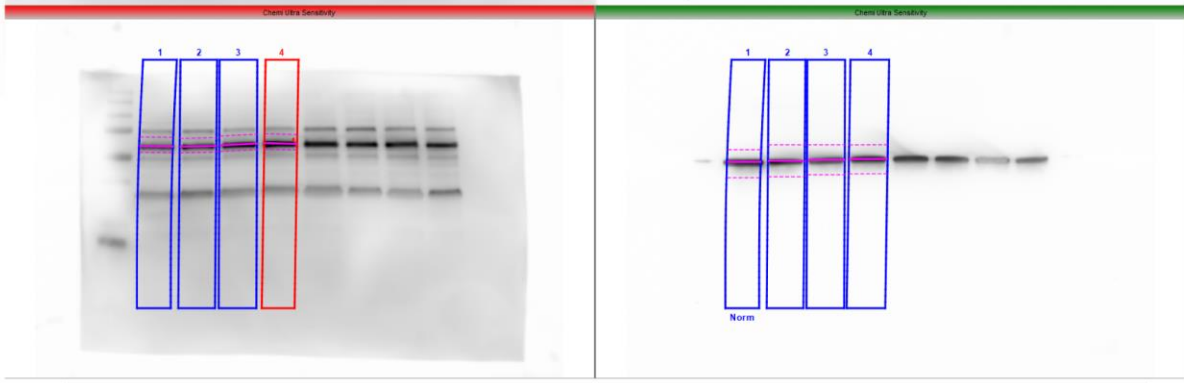

| Lane | Band No. | Band Label | Mol. Wt. (kDa) | Relative F | Adj. Volur | Volume (l) | Abs. Quan | Rel. Quan | Band % | Lane %   | Norm. Fac | Norm. Vol |
|------|----------|------------|----------------|------------|------------|------------|-----------|-----------|--------|----------|-----------|-----------|
| 1    | 1        |            | N/A            | 0.348837   | 1769495    | 5913040    | N/A       | N/A       | 100    | 48.423   | 1         | 1769495   |
| 1    | 1        |            | N/A            | 0.410853   | 19537070   | 21772380   | N/A       | N/A       | 100    | 92.67378 | 1         | 19537070  |
| 2    | 1        |            | N/A            | 0.348837   | 2085706    | 6415426    | N/A       | N/A       | 100    | 42.55136 | 0.996595  | 2078604   |
| 2    | 1        |            | N/A            | 0.406977   | 19995524   | 23078540   | N/A       | N/A       | 100    | 94.52551 | 0.996595  | 19927442  |
| 3    | 1        |            | N/A            | 0.341085   | 2770482    | 7543770    | N/A       | N/A       | 100    | 56.4367  | 1.004595  | 2783212   |
| 3    | 1        |            | N/A            | 0.403101   | 19323486   | 22032270   | N/A       | N/A       | 100    | 92.08185 | 1.004595  | 19412280  |
| 4    | 1        |            | N/A            | 0.337209   | 2962590    | 7420704    | N/A       | N/A       | 100    | 59.67579 | 0.820076  | 2429547   |
| 4    | 1        |            | N/A            | 0.399225   | 22392920   | 25024880   | N/A       | N/A       | 100    | 87.1088  | 0.820076  | 18363885  |

Figure 6 TGF B R2

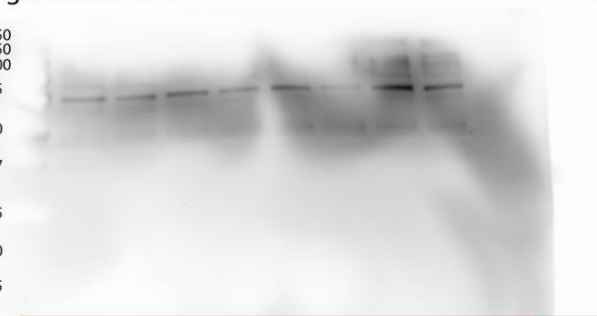

B-actin

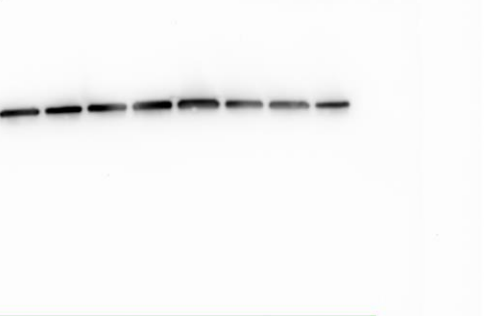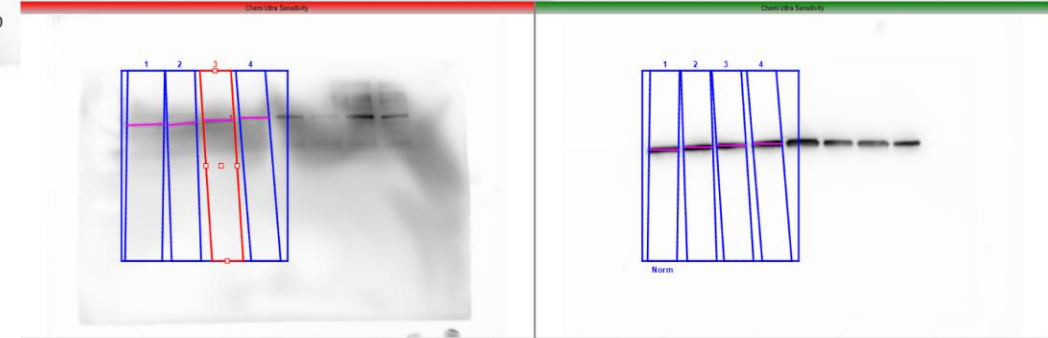

|   |   |     |          |         |          |     |     |     |          |          |         |
|---|---|-----|----------|---------|----------|-----|-----|-----|----------|----------|---------|
| 1 | 1 | N/A | 0.283105 | 504328  | 5409668  | N/A | N/A | 100 | 31.38382 | 1        | 504328  |
| 1 | 1 | N/A | 0.415525 | 2931810 | 3790850  | N/A | N/A | 100 | 94.87168 | 1        | 2931810 |
| 2 | 1 | N/A | 0.278539 | 412020  | 11548425 | N/A | N/A | 100 | 50.18545 | 0.827106 | 340784  |
| 2 | 1 | N/A | 0.401826 | 3544660 | 4425085  | N/A | N/A | 100 | 93.73849 | 0.827106 | 2931810 |
| 3 | 1 | N/A | 0.260274 | 620194  | 6686788  | N/A | N/A | 100 | 54.05179 | 1.001064 | 620853  |
| 3 | 1 | N/A | 0.392694 | 2928695 | 3734360  | N/A | N/A | 100 | 93.17736 | 1.001064 | 2931810 |
| 4 | 1 | N/A | 0.246575 | 457870  | 3757530  | N/A | N/A | 100 | 33.15508 | 0.866506 | 396747  |
| 4 | 1 | N/A | 0.383562 | 3383485 | 4219705  | N/A | N/A | 100 | 94.10568 | 0.866506 | 2931810 |
