# Supplementary material for: Induction of Reactive Bone Stromal Fibroblasts in 3D Models of Prostate Cancer Bone Metastases
Source: Biology (Basel). 2023 Jun 15;12(6):861. doi: 10.3390/biology12060861 (PMC10294842; doi:10.3390/biology12060861)
Supplement: Supplementary file 1 [file biology-12-00861-s001.zip › Table S1.xlsx]

## Sheet: Pathway
	Ingenuity Canonical Pathways	-log(p-value)	Ratio	z-score	Downregulated	No change	Upregulated	No overlap with dataset	Molecules
	tRNA Charging	3.61	0.154	2.449	0/39 (0%)	0/39 (0%)	6/39 (15%)	33/39 (85%)	CARS1,IARS1,LARS1,MARS1,SARS1,WARS1
	Sperm Motility	3.49	0.0623	2.121	4/257 (2%)	0/257 (0%)	12/257 (5%)	241/257 (94%)	ABHD3,CLK3,CSF1R,EPHA2,ERBB3,GNG11,GNG2,GUCY1A1,MET,MST1R,PLA2G7,PLCH2,PLCL2,PRKCH,ROR1,ZP3
	Glioma Signaling	3.2	0.08	2.646	1/125 (1%)	0/125 (0%)	9/125 (7%)	115/125 (92%)	CAMK1D,CAMK2B,CCND3,CDKN2A,CDKN2B,PDGFB,PIK3C2B,PRKCH,RAP2A,TGFA
	Xenobiotic Metabolism AHR Signaling Pathway	3.05	0.092	2.828	0/87 (0%)	0/87 (0%)	8/87 (9%)	79/87 (91%)	ALDH1L2,ALDH5A1,GSTA4,GSTK1,GSTM1,GSTT1,MGST2,NRIP1
	DHCR24 Signaling Pathway	2.89	0.073	3.162	1/137 (1%)	0/137 (0%)	9/137 (7%)	127/137 (93%)	AR,CASP3,KLF5,PDGFB,PIK3C2B,PLTP,PRKCH,RAP2A,SOX9,TM7SF2
	Glutathione-mediated Detoxification	2.82	0.135	2.236	0/37 (0%)	0/37 (0%)	5/37 (14%)	32/37 (86%)	GSTA4,GSTK1,GSTM1,GSTT1,MGST2
	Myelination Signaling Pathway	2.79	0.052	2.668	1/327 (0%)	0/327 (0%)	16/327 (5%)	310/327 (95%)	ATF4,ERBB3,FZD4,FZD8,GPR37,IRS1,ITGA6,ITGB4,LAMA3,LAMC2,MBP,MTHFD2,PDGFB,PIK3C2B,RAP2A,SLC2A1,SMAD3
	Xenobiotic Metabolism General Signaling Pathway	2.75	0.0699	2.53	1/143 (1%)	0/143 (0%)	9/143 (6%)	133/143 (93%)	GSTA4,GSTK1,GSTM1,GSTT1,MAPK13,MGST2,PIK3C2B,PRKCH,RAP2A,SLC51A
	Neuropathic Pain Signaling In Dorsal Horn Neurons	2.64	0.0792	2.121	1/101 (1%)	0/101 (0%)	7/101 (7%)	93/101 (92%)	CAMK1D,CAMK2B,GPR37,KCNN4,PIK3C2B,PLCH2,PLCL2,PRKCH
	Role of Tissue Factor in Cancer	2.5	0.058	2.309	3/207 (1%)	0/207 (0%)	9/207 (4%)	195/207 (94%)	CASP3,F2RL1,ITGA6,MAPK13,MET,PIK3C2B,PRSS2,PRSS3,RAP2A,RPS6KA2,TGFA,VEGFC
	Xenobiotic Metabolism PXR Signaling Pathway	2.28	0.057	2.111	0/193 (0%)	0/193 (0%)	11/193 (6%)	182/193 (94%)	ABCC3,ALDH1L2,ALDH5A1,CAMK2B,GSTA4,GSTK1,GSTM1,GSTT1,MGST2,NRIP1,PRKCH
	Apelin Endothelial Signaling Pathway	2.27	0.0638	2.236	2/141 (1%)	0/141 (0%)	7/141 (5%)	132/141 (94%)	GNG11,GNG2,GUCY1A1,KLF2,MEF2C,PIK3C2B,PRKCH,RAP2A,SMAD3
	HER-2 Signaling in Breast Cancer	2.18	0.0529	2.111	2/227 (1%)	0/227 (0%)	10/227 (4%)	215/227 (95%)	CASP3,COX7B2,COX7C,ERBB3,ITGB4,NUP50,PARD6A,PIK3C2B,PRKCH,RAP2A,SMAD3,TGFA
	Factors Promoting Cardiogenesis in Vertebrates	2.04	0.0588	2.121	1/153 (1%)	0/153 (0%)	8/153 (5%)	144/153 (94%)	ATF4,CAMK2B,FZD4,FZD8,LRP5,MEF2C,PLCH2,PLCL2,PRKCH
	Xenobiotic Metabolism CAR Signaling Pathway	1.86	0.0521	2.53	0/192 (0%)	0/192 (0%)	10/192 (5%)	182/192 (95%)	ABCC3,ALDH1L2,ALDH5A1,GSTA4,GSTK1,GSTM1,GSTT1,MGST2,NRIP1,PRKCH
	ERK5 Signaling	1.56	0.0676	2.236	0/74 (0%)	0/74 (0%)	5/74 (7%)	69/74 (93%)	ATF4,MEF2C,RAP2A,RPS6KA2,SFN
	Superpathway of Inositol Phosphate Compounds	1.35	0.0427	2.121	1/234 (0%)	0/234 (0%)	9/234 (4%)	224/234 (96%)	DUSP4,ITPKB,PIK3C2B,PLCH2,PPM1H,PPP1R1B,PSPH,PTPN20,PTPN22,PTPN6
	Breast Cancer Regulation by Stathmin1	1.23	0.0337	2.524	4/594 (1%)	0/594 (0%)	16/594 (3%)	574/594 (97%)	ADGRF1,ATF4,CAMK1D,CAMK2B,CCND3,CHRM3,F2RL1,FZD4,FZD8,GNG11,GNG2,GPR37,LPAR6,PDGFB,PIK3C2B,PRKCH,RAP2A,TGFA,TUBB2A,VEGFC
	Synaptogenesis Signaling Pathway	1.21	0.0381	3.317	1/315 (0%)	0/315 (0%)	11/315 (3%)	303/315 (96%)	ATF4,CAMK2B,CDH1,CDH11,CDH3,EFNA1,EPHA2,GUCY1A1,PIK3C2B,RAP2A,STXBP6,THBS2
	Calcium Signaling	1.16	0.0409	2.236	2/220 (1%)	0/220 (0%)	7/220 (3%)	211/220 (96%)	ATF4,CAMK1D,CAMK2B,MEF2C,MYL6,MYO5C,RAP2A,RCAN3,TNNI3
	Human Embryonic Stem Cell Pluripotency	1.03	0.0398	2.121	1/201 (0%)	0/201 (0%)	7/201 (3%)	193/201 (96%)	FZD4,FZD8,KLF2,PDGFB,PIK3C2B,PRKCH,RAP2A,SMAD3
	CREB Signaling in Neurons	0.96	0.0313	3.5	2/607 (0%)	0/607 (0%)	17/607 (3%)	588/607 (97%)	ADGRF1,ATF4,CAMK2B,CHRM3,F2RL1,FZD4,FZD8,GNG11,GNG2,GPR37,GUCY1A1,LPAR6,PDGFB,PIK3C2B,PLCH2,PLCL2,PRKCH,RAP2A,TGFA
	Opioid Signaling Pathway	0.944	0.0357	2.333	2/280 (1%)	0/280 (0%)	8/280 (3%)	270/280 (96%)	ATF4,CAMK1D,CAMK2B,GNG11,GNG2,GUCY1A1,PRKCH,RAP2A,RGS20,RPS6KA2
	Phagosome Formation	0.903	0.0302	2.837	4/695 (1%)	0/695 (0%)	17/695 (2%)	674/695 (97%)	ABHD3,ADGRF1,CHRM3,ELMO2,F2RL1,FZD4,FZD8,GPR37,ITGA5,ITGA6,ITGB4,LPAR6,MYL6,MYO5C,PIK3C2B,PLA2G7,PLD5,PRKCH,RAP2A,SCARA5,WIPF1
	Sirtuin Signaling Pathway	0.853	0.0341	2.121	4/293 (1%)	0/293 (0%)	6/293 (2%)	283/293 (97%)	CDH1,CPT1A,GADD45B,H1-0,LDHA,NDUFA3,PCK2,PFKFB3,SLC2A1,TIMM9
	Mitochondrial Dysfunction	0.766	0.032	-2.111	1/344 (0%)	0/344 (0%)	10/344 (3%)	333/344 (97%)	ATF4,CAMK2B,CASP3,COX7B2,COX7C,GSTK1,GSTM1,GSTT1,MGST2,NDUFA3,PIK3C2B
	Role Of Osteoblasts In Rheumatoid Arthritis Signaling Pathway	0.696	0.0328	-2.828	4/244 (2%)	0/244 (0%)	4/244 (2%)	236/244 (97%)	CTSC,CTSS,FZD4,FZD8,LRP5,MMP12,PIK3C2B,VEGFC
	S100 Family Signaling Pathway	0.611	0.0272	2.4	5/772 (1%)	0/772 (0%)	16/772 (2%)	751/772 (97%)	ADGRF1,ATF4,CAMK2B,CASP3,CDH1,CHRM3,F2RL1,FZD4,FZD8,GPR37,LPAR6,MAPK13,MMP12,PIK3C2B,PLCH2,PLCL2,PRKCH,S100A9,SMAD3,TGFA,VEGFC
	Neurovascular Coupling Signaling Pathway	0.543	0.0302	2.646	0/232 (0%)	0/232 (0%)	7/232 (3%)	225/232 (97%)	ABHD3,CHRM3,CTH,GUCY1A1,KCNMA1,KCNN4,PLA2G7
	Transcriptional Regulatory Network in Embryonic Stem Cells	0.487	0.0305	2.236	0/164 (0%)	0/164 (0%)	5/164 (3%)	159/164 (97%)	FZD4,FZD8,PIK3C2B,RAP2A,SMAD3

## Sheet: GO
	Categories	Diseases or Functions Annotation	p-value	Predicted Activation State	Activation z-score	Molecules	# Molecules
	Cancer,Organismal Injury and Abnormalities	Cancer of secretory structure	1.41e-19	Increased	2.241	AADAC,ABCA13,ABCC3,ABCC9,ABCG1,ABHD2,ABHD3,ABI3,ACER3,ACP3,ACSF2,ACTR1A,ADAM15,ADAM8,ADGRF1,ADIRF,AFP,AGR2,AKAP1,ALDH1L2,ALDH5A1,ANGPTL4,ANK3,ANKRD29,ANO1,ANO4,ANXA11,AP3M1,AR,ARFGEF3,ARHGAP27,ARHGAP28,ARHGAP29,ARMH1,ARSD,ASB9,ASL,ASNS,ATF4,ATP9A,B3GALNT1,B4GAT1,B9D2,BBLN,BBS1,BPHL,BTN2A1,C19orf33,C2CD4B,C5,CA12,CAMK1D,CAMK2B,CASP3,CASTOR1,CAV1,CCDC184,CCM2,CCND3,CD44,CDH1,CDH11,CDH3,CDK18,CDK2AP…	447
	Cancer,Organismal Injury and Abnormalities	Anogenital cancer	7.68e-18	Increased	3.246	AADAC,ABCA13,ABCC3,ABCC9,ABCG1,ABHD2,ABHD3,ACP3,ACSF2,ACTR1A,ADAM15,ADAM8,ADGRF1,ADK,AFP,AGR2,AIG1,AKAP1,ALDH1L2,ALDH5A1,ANGPTL4,ANK3,ANKRD29,ANO4,ANXA11,AR,ARFGEF3,ARHGAP27,ARHGAP29,ARMH1,ARSD,ASL,ASNS,ATF4,ATP9A,B3GALNT1,BBS1,BPHL,BTN2A1,C3orf70,C5,C5orf46,CAMK2B,CASP3,CASTOR1,CAV1,CCDC184,CCM2,CCND3,CD44,CD9,CDH1,CDH11,CDH3,CDK18,CDK2AP2,CDK9,CDKN2A,CDKN2B,CEACAM6,CEBPG,CEP78,CGNL1,CHAC1,CHRD,…	386
	Cellular Movement	Invasion of cells	9.99e-17	Increased	2.485	ADAM15,ADAM8,AGR2,ANGPTL4,ANK3,ANO1,AR,ASNS,B4GAT1,CASP3,CAV1,CD44,CD9,CDH1,CDH11,CDH3,CDKN2A,CEACAM6,CHRD,CLDN7,COL11A1,COL7A1,CRB3,CST1,CST4,CTSS,DIXDC1,EFNA1,ELMO2,EPCAM,EPHA2,ERBB3,ETV5,FBN2,FKBP4,FUT8,FXYD5,GDF15,GLRB,HAS2,HAS3,HOXA13,HOXB13,IGFBP5,IL13RA2,INHBB,IRS1,ITGA5,ITGA6,ITGB4,JAG1,KCNMA1,KLF2,KLF5,KRT19,LAMA3,LAMC2,LCN2,LDHA,LINC00261,LRIG1,LRP5,MAP4K4,MAPRE3,MDK,MECOM,MET,MMP12,MST…	115
	Cardiovascular System Development and Function	Development of vasculature	4.12e-16	Increased	2.22	ADAM15,ADAM8,AKAP1,ANGPTL4,AR,C5,CASP3,CAV1,CCM2,CD44,CD9,CDH1,CDKN2A,CDKN2B,CHRD,COL5A1,COL7A1,CSF1R,CTH,CTSS,CXADR,DIXDC1,EFNA1,EMC10,EPHA2,F2RL1,FABP4,FBN2,FBXL12,FLNB,FZD4,FZD8,GSTM1,GUCY1A1,HAS2,HAS3,HEY1,HOXA13,HPGD,IGFBP3,IGFBP5,IL13RA2,IL1RL1,INPP4B,IRS1,ITGA5,ITGB1BP1,ITGB4,JAG1,KCNMA1,KLF2,KLF5,LCN2,LDHA,LRP5,MDK,MECOM,MEF2C,MET,MMP12,MST1R,NOX5,NTN4,ODC1,OGT,ONECUT2,PDGFB,PFKFB3,PI3,PI…	103
	Cancer,Organismal Injury and Abnormalities,Reproductive System Disease	Genital tumor	1.33e-15	Increased	2.466	AADAC,ABCA13,ABCC3,ABCC9,ABCG1,ABHD2,ABHD3,ACP3,ACSF2,ACTR1A,ADAM15,ADAM8,ADGRF1,ADK,AFP,AGR2,AIG1,AKAP1,ALDH1L2,ALDH5A1,ANGPTL4,ANK3,ANO4,ANXA11,AR,ARFGEF3,ARHGAP27,ARHGAP29,ARSD,ASNS,ATF4,ATP9A,B3GALNT1,B4GAT1,BBS1,BPHL,BTN2A1,C3orf70,C5,C5orf46,CAMK2B,CASP3,CASTOR1,CAV1,CCDC184,CCM2,CCND3,CD44,CDH1,CDH11,CDH3,CDK18,CDK2AP2,CDK9,CDKN2A,CDKN2B,CEACAM6,CEBPG,CEP78,CGNL1,CHAC1,CHRD,CHRM3,CLDN7,CLH…	351
	Cardiovascular System Development and Function,Organismal Development,Tissue Development	Angiogenesis	1.53e-15	Increased	2.238	ADAM15,ADAM8,AKAP1,ANGPTL4,AR,C5,CASP3,CAV1,CCM2,CD44,CD9,CDH1,CDKN2A,CDKN2B,CHRD,COL5A1,COL7A1,CSF1R,CTH,CTSS,DIXDC1,EFNA1,EMC10,EPHA2,F2RL1,FABP4,FLNB,FZD4,FZD8,GSTM1,GUCY1A1,HAS2,HAS3,HEY1,HOXA13,IGFBP3,IGFBP5,IL13RA2,IL1RL1,INPP4B,IRS1,ITGA5,ITGB1BP1,ITGB4,JAG1,KCNMA1,KLF2,KLF5,LCN2,LDHA,LRP5,MDK,MECOM,MEF2C,MET,MMP12,MST1R,NOX5,NTN4,ODC1,OGT,ONECUT2,PDGFB,PFKFB3,PIK3C2B,PLA2G7,PRICKLE1,PTHLH…	95
	Cardiovascular System Development and Function,Organismal Development,Tissue Development	Vasculogenesis	2.39e-15	Increased	2.209	ADAM15,AKAP1,ANGPTL4,AR,C5,CASP3,CAV1,CCM2,CD44,CD9,CDH1,CDKN2A,CDKN2B,CHRD,COL7A1,CSF1R,CTH,EFNA1,EMC10,EPHA2,F2RL1,FABP4,FZD4,GSTM1,GUCY1A1,HAS2,HAS3,HEY1,HOXA13,IGFBP3,IGFBP5,IL13RA2,IL1RL1,INPP4B,IRS1,ITGA5,ITGB1BP1,JAG1,KCNMA1,KLF2,KLF5,LCN2,LDHA,LRP5,MDK,MEF2C,MET,MMP12,MST1R,NOX5,ODC1,OGT,PDGFB,PFKFB3,PIK3C2B,PLA2G7,PRICKLE1,PTHLH,PTPN6,RGS2,RHOB,ROR1,S100A9,SARS1,SCUBE3,SEMA3A,SERPINE1,SL…	83
	Cellular Movement	Invasion of tumor cell lines	4.94e-15	Increased	2.477	ADAM15,ADAM8,AGR2,ANGPTL4,ANK3,AR,ASNS,B4GAT1,CASP3,CAV1,CD44,CD9,CDH1,CDH11,CDH3,CDKN2A,CEACAM6,CHRD,CLDN7,COL11A1,COL7A1,CRB3,CST1,CST4,CTSS,DIXDC1,EFNA1,ELMO2,EPCAM,EPHA2,ERBB3,ETV5,FKBP4,FUT8,FXYD5,GDF15,HAS2,HAS3,HOXA13,HOXB13,IL13RA2,INHBB,IRS1,ITGA5,ITGA6,ITGB4,JAG1,KLF2,KRT19,LAMC2,LCN2,LDHA,LINC00261,LRIG1,LRP5,MAP4K4,MAPRE3,MDK,MECOM,MET,MMP12,MST1R,NET1,NFE2L3,NMU,NR2C2,NUPR1,ONECUT2,P…	100
	Cellular Movement	Cell movement	5.67e-15	Increased	2.757	ABCG1,ABHD2,ABI3,ADAM15,ADAM8,AFP,AGR2,AKAP1,ANGPTL4,AR,ASNS,B4GAT1,BBS1,C5,CAMK1D,CAV1,CD44,CD9,CDH1,CDH11,CDH3,CDKN2A,CEACAM6,CFD,CHRD,CHRM3,CLDN7,COL11A1,COL7A1,CRB3,CSF1R,CTH,CTSC,CTSS,CXADR,DACH1,DDIT4,DSC2,DUSP4,EBF3,EFNA1,ELMO2,EMC10,EPCAM,EPHA2,ERBB3,ETV5,F2RL1,FABP4,FERMT1,FKBP4,FLNB,FUT8,FZD4,GDF15,GLRB,GPR37,GUCY1A1,HAS2,HAS3,HEY1,HOXA13,IGFBP3,IGFBP5,IL13RA2,IL1RL1,INPP4B,IRS1,IRX2,IT…	176
	Cancer,Organismal Injury and Abnormalities,Reproductive System Disease	Genital tract cancer	4.04e-14	Increased	2.608	AADAC,ABCA13,ABCC3,ABCC9,ABCG1,ABHD2,ABHD3,ACP3,ACSF2,ACTR1A,ADAM15,ADAM8,ADGRF1,AFP,AGR2,AKAP1,ALDH1L2,ALDH5A1,ANGPTL4,ANK3,ANO4,ANXA11,AR,ARFGEF3,ARHGAP27,ARHGAP29,ARSD,ASNS,ATF4,ATP9A,B3GALNT1,BBS1,BPHL,BTN2A1,C3orf70,C5,C5orf46,CAMK2B,CASP3,CASTOR1,CAV1,CCDC184,CCM2,CCND3,CD44,CDH1,CDH11,CDH3,CDK18,CDK2AP2,CDK9,CDKN2A,CDKN2B,CEACAM6,CEBPG,CEP78,CGNL1,CHAC1,CHRD,CHRM3,CLDN7,CLHC1,CMIP,COBL,COL…	342
	Cancer	Cell transformation	3.22e-13	Increased	2.024	AADAC,ABCA13,ABCC3,ABCC9,ABCG1,ABI3,ADAM8,ADGRF1,AGR2,AIG1,AKAP1,ALDH5A1,ANGPTL4,ANK3,ANO1,ANO4,ANXA11,AR,ARFGEF3,ARHGAP28,ARSD,ASNS,ATF4,C2CD4B,C3orf70,C5,C5orf46,CAMK2B,CASP3,CASTOR1,CAV1,CCND3,CD44,CD9,CDH1,CDH11,CDH3,CDK2AP2,CDK9,CDKN2A,CDKN2B,CEBPG,CFD,CGNL1,CHRD,CHRM3,CLDN7,CLK3,CMIP,COBL,COL10A1,COL11A1,COL4A5,COL5A1,COL6A3,COL7A1,CPT1A,CSF1R,CSRNP1,CSRNP3,CST4,CSTA,CTH,CTPS2,CTSC,CTSS,CXA…	315
	Cancer,Organismal Injury and Abnormalities	Growth of tumor	1.03e-12	Increased	2.313	ADAM15,ANGPTL4,ANO1,AR,ASL,ATF4,CA12,CASP3,CAV1,CCND3,CD44,CDH1,CDH3,CDK18,CDKN2A,CDKN2B,CLK3,COL7A1,CSF1R,CTSS,DACH1,DSC2,DYNC1I1,EFNA1,EPHA2,ERBB3,F2RL1,FADS2,FUT8,GDF15,HHIP-AS1,HOXB13,HPGD,IGFBP3,IGFBP5,IL13RA2,IL1RL1,INHBB,INPP4B,IRS1,ITGA5,JAG1,KLF5,KRT19,LAMA3,LAMC2,LCN2,LDHA,LRIG1,MAPK13,MET,MST1R,MTHFD2,NEDD4L,NFE2L3,NLRP3,NR2C2,NUPR1,ODC1,OGT,ONECUT2,PDGFB,PFKFB3,PFKFB4,PGGT1B,PHGDH,PPP…	101
	Cellular Development,Cellular Growth and Proliferation	Cell proliferation of tumor cell lines	1.65e-11	Increased	3.547	ACER3,ACP3,ADAM15,AFP,ANGPTL4,ANO1,AR,ASNS,ATF4,CASP3,CAV1,CCND3,CD44,CD9,CDH1,CDH11,CDKN2A,CDKN2B,CEACAM6,CHRM3,CMIP,COL11A1,COL6A3,CRB3,CSF1R,CXADR,DACH1,DSC2,DUSP4,EFNA1,EMC10,EPCAM,EPHA2,ERBB3,F2RL1,FADS2,FKBP4,FUT8,FZD8,G0S2,GDF15,GNG2,GSTM1,HAS2,HAS3,HHIP-AS1,HMCES,HOXA13,HOXB13,HPGD,IGFBP3,IGFBP5,IL13RA2,INPP4B,IRS1,ITGA5,ITGA6,ITGB4,JAG1,KCNN4,KLF2,KLF5,KRT19,LCN2,LDHA,LINC00261,LRIG1,LRP…	145
	Cellular Assembly and Organization,Cellular Function and Maintenance	Organization of cytoskeleton	2.62e-11	Increased	2.379	ABCG1,ABI3,ADGRF1,ANGPTL4,ANK3,AR,ARL6,B4GAT1,B9D2,BBS1,C5,CAMK1D,CAMK2B,CASP3,CAV1,CD44,CD9,CDH1,CDK18,CDK2AP2,CDK9,CDKN2A,CGNL1,COBL,CSF1R,CTSS,CXADR,CYFIP2,DIXDC1,DYNLT2B,EFNA1,EMC10,EPHA2,F2RL1,FKBP4,FLNB,FUT8,FZD4,GDF15,GPR37,GSTM1,HAS2,HAS3,HHIP-AS1,IL1RL1,ITGA5,ITGA6,ITGB4,KLF2,KLF5,KRT20,LCN2,LDHA,MAP4K4,MAPK13,MAPRE3,MATN2,MBP,MDK,MEF2C,MET,MMP12,MST1R,MYLIP,NEBL,NEDD4L,NET1,NFIB,NLRP3,N…	114
	Cancer,Organismal Injury and Abnormalities	Pelvic carcinoma	3.59e-11	Increased	2.219	AADAC,ABCA13,ABCC3,ABCC9,ABCG1,ABHD2,ABHD3,ACP3,ACSF2,ACTR1A,ADAM8,ADGRF1,AFP,AKR1E2,ALDH1L2,ALDH5A1,ANGPTL4,ANK3,ANO4,ANXA11,AR,ARFGEF3,ARHGAP27,ARHGAP29,ARSD,ASNS,ATF4,ATP9A,B3GALNT1,BBS1,BPHL,BTN2A1,C3orf70,C5,C5orf46,C6orf141,CAMK2B,CASP3,CASTOR1,CAV1,CCDC184,CCM2,CCND3,CD44,CDH1,CDH11,CDH3,CDK18,CDK2AP2,CDK9,CDKN2A,CDKN2B,CEBPG,CEP78,CGNL1,CHRD,CHRM3,CLDN7,CLHC1,CMIP,COBL,COL11A1,COL4A5,COL5…	334
	Cellular Assembly and Organization,Cellular Function and Maintenance	Microtubule dynamics	5.76e-11	Increased	2.652	ABCG1,ABI3,ADGRF1,ANGPTL4,ANK3,AR,ARL6,B4GAT1,B9D2,BBS1,C5,CAMK1D,CAMK2B,CASP3,CAV1,CD44,CD9,CDH1,CDK18,CDK2AP2,CDK9,COBL,CSF1R,CTSS,CYFIP2,DIXDC1,DYNLT2B,EFNA1,EMC10,EPHA2,F2RL1,FKBP4,FUT8,FZD4,GDF15,GPR37,GSTM1,HAS2,HAS3,IL1RL1,ITGA5,ITGA6,ITGB4,KLF2,KLF5,LCN2,LDHA,MAP4K4,MAPK13,MAPRE3,MATN2,MBP,MDK,MEF2C,MET,MMP12,MYLIP,NEBL,NEDD4L,NET1,NFIB,NLRP3,NUPR1,OGT,ONECUT2,PALM,PARD6A,PDGFB,PHGDH,PKP1…	103
	Organismal Injury and Abnormalities,Organismal Survival	Organismal death	7.12e-11	Decreased	-4.56	ABCC9,ABCG1,ACP3,ADAM15,ADK,AGR2,ALDH5A1,ANGPTL4,ANK3,ANO1,AR,ASL,ATF4,B3GALNT1,C5,CA12,CASP3,CAV1,CCM2,CCND3,CD44,CD9,CDH1,CDH3,CDKN2A,CDKN2B,CEBPG,CFD,CHRD,CLDN7,COL10A1,COL11A1,COL5A1,COL7A1,CPT1A,CSF1R,CSRNP1,CSRNP3,CTH,CXADR,DACH1,DHPS,DSC2,DSC3,ELOA,ERBB3,ETV5,F2RL1,FADS2,FBN2,FBXL12,FCGRT,FERMT1,FKBP4,FLNB,FUT8,GAA,GDF15,GPC6,GSTK1,GSTM1,GUCY1A1,H1-0,HAS2,HEY1,HNMT,HOXA13,HPGD,HSD17B2,IFNA…	166
	Cellular Movement	Cell movement of tumor cell lines	1.22e-10	Increased	2.352	ADAM15,AGR2,ANGPTL4,AR,ASNS,B4GAT1,C5,CAV1,CD44,CD9,CDH1,CDH11,CDH3,CDKN2A,CLDN7,COL11A1,COL7A1,CRB3,CSF1R,CTH,ELMO2,EPHA2,ERBB3,ETV5,F2RL1,FKBP4,FLNB,GDF15,HAS2,HAS3,HOXA13,IGFBP3,INPP4B,IRS1,ITGA5,ITGA6,ITGB4,KCNN4,KLF2,KLF5,KRT19,LAMA3,LAMC2,LCN2,LDHA,LINC00261,LMO7,LRIG1,LRP5,MAP4K4,MAPK13,MAPRE3,MDK,MET,MMP12,MST1R,NET1,NFE2L3,NFIB,NMU,NOX5,NUPR1,OGT,ONECUT2,PFKFB4,PIK3C2B,PLEK2,PPP1R1B,PRDX…	101
	Cellular Assembly and Organization,Cellular Function and Maintenance	Organization of cytoplasm	1.55e-10	Increased	2.379	ABCG1,ABI3,ADGRF1,ANGPTL4,ANK3,AR,ARL6,B4GAT1,B9D2,BBS1,C5,CAMK1D,CAMK2B,CASP3,CAV1,CD44,CD9,CDH1,CDK18,CDK2AP2,CDK9,CDKN2A,CGNL1,COBL,CSF1R,CTSS,CXADR,CYFIP2,DIXDC1,DYNLT2B,EFNA1,EMC10,EPHA2,F2RL1,FKBP4,FLNB,FUT8,FZD4,GAA,GDF15,GPR37,GSTM1,HAS2,HAS3,HHIP-AS1,IL1RL1,ITGA5,ITGA6,ITGB4,KLF2,KLF5,KRT20,LCN2,LDHA,MAP4K4,MAPK13,MAPRE3,MATN2,MBP,MDK,MEF2C,MET,MMP12,MST1R,MYLIP,NEBL,NEDD4L,NET1,NFIB,NLR…	119
	Cancer,Organismal Injury and Abnormalities,Reproductive System Disease	Genital carcinoma	2.11e-10	Increased	2.219	AADAC,ABCA13,ABCC3,ABCC9,ABCG1,ABHD2,ABHD3,ACP3,ACSF2,ACTR1A,ADAM8,ADGRF1,AFP,ALDH1L2,ALDH5A1,ANGPTL4,ANK3,ANO4,ANXA11,AR,ARFGEF3,ARHGAP27,ARHGAP29,ARSD,ASNS,ATF4,ATP9A,B3GALNT1,BBS1,BPHL,BTN2A1,C3orf70,C5,C5orf46,CAMK2B,CASP3,CASTOR1,CAV1,CCDC184,CCM2,CD44,CDH1,CDH11,CDH3,CDK18,CDK2AP2,CDK9,CDKN2A,CEBPG,CEP78,CGNL1,CHRD,CHRM3,CLDN7,CLHC1,CMIP,COBL,COL11A1,COL4A5,COL5A1,COL6A3,COL7A1,CPT1A,CSF1R,…	310
	Cancer,Organismal Injury and Abnormalities,Reproductive System Disease	Male genital neoplasm	1.23e-09	Increased	2.267	ABCA13,ABCC9,ABHD3,ACP3,ACSF2,ACTR1A,ADAM15,ADGRF1,AFP,AGR2,AKAP1,ALDH5A1,ANK3,ANO4,ANXA11,AR,ARFGEF3,ARHGAP29,ARSD,ASNS,B3GALNT1,B4GAT1,BTN2A1,C5,CAMK2B,CASP3,CAV1,CCDC184,CD44,CDH1,CDH11,CDH3,CDK18,CDK2AP2,CDK9,CDKN2A,CDKN2B,CEP78,CHAC1,CHRD,CHRM3,CMIP,COBL,COL11A1,COL5A1,COL6A3,COL7A1,CPT1A,CSF1R,CSRNP1,CTSC,CYFIP2,DACH1,DDIT4,DDX31,DENND11,DHRS9,DSC2,DSC3,ELMO2,EMC10,EPCAM,EPHA2,ERBB3,ETV5,F2…	200
	Cell Death and Survival	Cell survival	1.68e-09	Increased	3.51	ABCC3,ADK,AGR2,AR,ASNS,ATF4,C5,CAMK2B,CARS1,CASP3,CAV1,CCND3,CD44,CD9,CDH1,CDH3,CDKN2A,CLK3,COL5A1,CSF1R,CTH,DOLPP1,DYNC1I1,EBF3,EBNA1BP2,EFNA1,EPHA2,ERBB3,ETV5,F2RL1,FKBP4,FUT8,GADD45B,GDF15,GPR37,GSTM1,GUCY1A1,HEY1,HHIP-AS1,HMCES,IGFBP3,IGFBP5,IL1RL1,IRS1,ITGA5,ITGA6,ITGB1BP1,ITPKB,JAG1,KLF2,KLF5,KRT19,LAMA3,LCN2,LDHA,LRIG1,MAP4K4,MBP,MDK,MECOM,MEF2C,MET,MST1R,NFE2L1,NFE2L3,NR2C2,NRIP1,NTN4,NUP…	114
	Cell Morphology,Cellular Assembly and Organization,Cellular Function and Maintenance	Formation of cellular protrusions	1.83e-09	Increased	2.652	ABCG1,ABI3,ADGRF1,ANGPTL4,ANK3,AR,ARL6,B4GAT1,B9D2,BBS1,C5,CAMK1D,CAMK2B,CASP3,CAV1,CD44,CD9,CDH1,CDK18,CDK9,COBL,CYFIP2,DIXDC1,DYNLT2B,EFNA1,EMC10,EPHA2,F2RL1,FUT8,FZD4,GDF15,GPR37,IL1RL1,ITGA5,ITGA6,ITGB4,KLF5,LCN2,LDHA,MAP4K4,MAPK13,MATN2,MBP,MDK,MEF2C,MET,MYLIP,NEBL,NEDD4L,NFIB,NUPR1,OGT,ONECUT2,PALM,PARD6A,PDGFB,PHGDH,PKP1,PPP1R1B,PRICKLE1,PSD,PTPN20,PTPN22,RAB27B,RAB3IP,RAP2A,RGS2,RHOB,RHOD…	85
	Cancer,Organismal Injury and Abnormalities,Reproductive System Disease	Prostatic tumor	2.18e-09	Increased	2.394	ABCA13,ABCC9,ABHD3,ACP3,ACSF2,ACTR1A,ADAM15,ADGRF1,AFP,AGR2,AKAP1,ALDH5A1,ANK3,ANO4,ANXA11,AR,ARFGEF3,ARHGAP29,ARSD,ASNS,B3GALNT1,B4GAT1,BTN2A1,C5,CAMK2B,CASP3,CAV1,CCDC184,CD44,CDH1,CDH11,CDH3,CDK18,CDK2AP2,CDK9,CDKN2A,CEP78,CHAC1,CHRD,CHRM3,CMIP,COBL,COL11A1,COL5A1,COL6A3,COL7A1,CPT1A,CSF1R,CSRNP1,CTSC,CYFIP2,DACH1,DDIT4,DDX31,DENND11,DHRS9,DSC2,DSC3,ELMO2,EMC10,EPCAM,EPHA2,ERBB3,ETV5,F2RL1,FAB…	195
	Cellular Development,Connective Tissue Development and Function,Tissue Development	Differentiation of connective tissue cells	4.85e-09	Increased	2.113	ADAM8,ADIRF,ADK,ATF4,C5,CASP3,CD44,CD9,CDK9,CDKN2A,CHRD,CMTM7,CSF1R,CSRNP1,EPHA2,ERBB3,F2RL1,FABP4,FBN2,GADD45B,GPC4,HAS2,HEY1,IGFBP3,IGFBP5,IL1RL1,INPP4B,IRS1,ITGA5,ITGA6,JAG1,KLF5,LRP5,MDK,MECOM,MEF2C,NFE2L1,NFIB,NLRP3,PDGFB,PILRB,PLCL2,PTHLH,RASSF2,RGS2,SCUBE3,SELENBP1,SEMA3A,SLC1A5,SMAD3,SOX9,THY1,TNC,TRIB2,TRIB3,VEGFC	56
	Cancer,Organismal Injury and Abnormalities,Reproductive System Disease	Malignant neoplasm of male genital organ	6.48e-09	Increased	2.608	ABCA13,ABCC9,ABHD3,ACP3,ACSF2,ACTR1A,ADAM15,ADGRF1,AFP,AGR2,AKAP1,ALDH5A1,ANK3,ANO4,ANXA11,AR,ARFGEF3,ARHGAP29,ARSD,ASNS,B3GALNT1,BTN2A1,C5,CAMK2B,CASP3,CAV1,CCDC184,CD44,CDH1,CDH11,CDH3,CDK18,CDK2AP2,CDK9,CDKN2A,CEP78,CHAC1,CHRD,CHRM3,CMIP,COBL,COL11A1,COL5A1,COL6A3,COL7A1,CPT1A,CSF1R,CSRNP1,CTSC,CYFIP2,DACH1,DDIT4,DDX31,DENND11,DHRS9,DSC2,DSC3,ELMO2,EMC10,EPCAM,EPHA2,ERBB3,ETV5,F2RL1,FABP4,FAM1…	195
	Cancer,Organismal Injury and Abnormalities,Reproductive System Disease	Prostate cancer	7.69e-09	Increased	2.421	ABCA13,ABCC9,ABHD3,ACP3,ACSF2,ACTR1A,ADAM15,ADGRF1,AFP,AGR2,AKAP1,ALDH5A1,ANK3,ANO4,ANXA11,AR,ARFGEF3,ARHGAP29,ARSD,ASNS,B3GALNT1,BTN2A1,C5,CAMK2B,CASP3,CAV1,CCDC184,CD44,CDH1,CDH11,CDH3,CDK18,CDK2AP2,CDK9,CDKN2A,CEP78,CHAC1,CHRD,CHRM3,CMIP,COBL,COL11A1,COL5A1,COL6A3,COL7A1,CPT1A,CSF1R,CSRNP1,CTSC,CYFIP2,DACH1,DDIT4,DDX31,DENND11,DHRS9,DSC2,DSC3,ELMO2,EMC10,EPCAM,EPHA2,ERBB3,ETV5,F2RL1,FABP4,FAR2…	192
	Cell Death and Survival	Cell viability	8.41e-09	Increased	3.284	ABCC3,ADK,AGR2,AR,ASNS,ATF4,C5,CAMK2B,CARS1,CASP3,CAV1,CCND3,CD44,CD9,CDH1,CDH3,CDKN2A,CLK3,COL5A1,CSF1R,CTH,DOLPP1,DYNC1I1,EBNA1BP2,EFNA1,EPHA2,ERBB3,F2RL1,FKBP4,FUT8,GADD45B,GDF15,GPR37,GSTM1,GUCY1A1,HEY1,HHIP-AS1,HMCES,IGFBP3,IGFBP5,IL1RL1,ITGA6,ITGB1BP1,ITPKB,JAG1,KLF2,KLF5,KRT19,LAMA3,LCN2,LDHA,LRIG1,MAP4K4,MBP,MDK,MECOM,MEF2C,MET,MST1R,NFE2L1,NFE2L3,NR2C2,NRIP1,NTN4,NUP210,NUPR1,OGT,PCDH18,…	108
	Cell Morphology,Cellular Movement	Cell spreading	1.01e-08	Increased	2.291	C5,CD44,CD9,CDH11,CDKN2A,EFNA1,EPHA2,FERMT1,FLNB,IGFBP5,ITGA5,ITGA6,ITGB1BP1,ITGB4,LAMA3,MAPRE3,MDK,MET,MST1R,NET1,OGT,PIK3C2B,PTPN22,RAP2A,RHOB,RHOD,SEMA3A,SERPINE1,THBS2,TNC	30
	Cell Morphology,Tissue Development	Tubulation of cells	2.01e-08	Increased	2.161	ADAM15,AKAP1,ANGPTL4,CAV1,CD44,CD9,CDKN2A,EPHA2,FZD4,IGFBP3,IL1RL1,KCNMA1,MMP12,PDGFB,RHOB,SCUBE3,SEMA3A,SMAD3,SOX7,SULF2,THY1,VEGFC	22
	Cancer,Organismal Injury and Abnormalities,Reproductive System Disease	Prostatic carcinoma	1.48e-07	Increased	2.219	ABCA13,ABCC9,ABHD3,ACP3,ACSF2,ACTR1A,ADGRF1,AFP,ANK3,ANO4,ANXA11,AR,ARFGEF3,ARHGAP29,ARSD,ASNS,B3GALNT1,BTN2A1,CAMK2B,CAV1,CCDC184,CD44,CDH1,CDH11,CDK18,CDK2AP2,CDK9,CDKN2A,CEP78,CHRD,CHRM3,CMIP,COBL,COL11A1,COL6A3,COL7A1,CPT1A,CSF1R,CSRNP1,CTSC,CYFIP2,DDIT4,DDX31,DENND11,DHRS9,DSC2,DSC3,ELMO2,EMC10,EPCAM,EPHA2,ERBB3,ETV5,F2RL1,FABP4,FAR2,FBXL12,FERMT1,FLNB,FOLR3,FZD4,GADD45B,GDF15,HAS3,HEY1,HLA-…	167
	Cellular Development,Cellular Growth and Proliferation	Cell proliferation of carcinoma cell lines	2.14e-07	Increased	2.652	ADAM15,AR,ASNS,CASP3,CAV1,CCND3,CD44,CDH1,CDKN2A,CHRM3,EPCAM,EPHA2,ERBB3,FADS2,FUT8,GDF15,HAS2,HAS3,HOXA13,HPGD,IGFBP3,IRS1,KLF2,LCN2,LINC00261,LRP5,MAPK13,MET,MST1R,NFIB,NLRP3,NUPR1,ONECUT2,PARD6A,PFKFB3,PIK3C2B,PLEK2,PLS1,PYCR1,RHOB,ROR1,S100A9,SERPINE1,SLC1A5,SLC2A1,SLC3A2,SLC4A7,SOX9,TBXAS1,TGFA,THBS2,TNC,TRIB2,TRIB3,TUBB2A	55
	Cellular Movement	Homing of cells	2.95e-07	Increased	2.977	ADAM8,AFP,AGR2,C5,CAMK1D,CAV1,CD44,CD9,CSF1R,CTH,CXADR,EFNA1,ELMO2,EPHA2,ERBB3,F2RL1,GLRB,IGFBP3,ITGA5,ITGA6,KCNN4,LCN2,MDK,MEF2C,MET,PDGFB,PLA2G7,PTPN6,RHOB,RHOD,S100A9,SEMA3A,SERPINE1,SLPI,SMAD3,TFF1,TFF2,TFF3,TGFA,THBS2,TNFRSF6B,TRAF3IP2,TRPV2,VEGFC,WARS1,WIPF1	46
	Cardiovascular System Development and Function	Morphogenesis of cardiovascular system	7.33e-07	Increased	2.213	CCM2,CHRD,COL11A1,COL5A1,EFNA1,EPHA2,FZD4,GAA,HEY1,HOXA13,JAG1,LCN2,LRP5,MDK,MECOM,MEF2C,MET,ODC1,PDGFB,PIK3C2B,PRICKLE1,RHOB,SMAD3,SOX17,SOX9,TNNI3	26
	Cellular Movement	Chemotaxis	1.03e-06	Increased	2.898	ADAM8,AFP,AGR2,C5,CAMK1D,CAV1,CD44,CD9,CSF1R,CTH,CXADR,EFNA1,ELMO2,EPHA2,ERBB3,F2RL1,GLRB,ITGA6,KCNN4,LCN2,MDK,MET,PDGFB,PLA2G7,PTPN6,RHOB,RHOD,S100A9,SEMA3A,SERPINE1,SLPI,SMAD3,TFF1,TFF2,TFF3,TGFA,THBS2,TNFRSF6B,TRAF3IP2,TRPV2,VEGFC,WARS1,WIPF1	43
	Tissue Morphology	Quantity of cells	1.1e-06	Increased	2.033	ABCG1,ADAM8,AFP,AGR2,ANK3,AR,ATF4,C5,CASP3,CAV1,CCND3,CD44,CD9,CDH1,CDH11,CDKN2A,CDKN2B,CEBPG,COL10A1,COL5A1,CSF1R,CTH,CTSS,DACH1,DUSP4,EPHA2,ERBB3,F2RL1,FADS2,FERMT1,GDF15,GPR37,GUCY1A1,HEY1,IFNAR2,IGFBP3,IGFBP5,IL13RA2,IL1RL1,INHBB,INPP4B,IRS1,ITGA6,ITGB1BP1,ITGB4,ITPKB,JAG1,KLF2,KLF5,KRT19,LAMA3,LCN2,LDHA,LINC00261,LRP5,MAPK13,MATN2,MBP,MDK,MECOM,MEF2C,MET,MMP12,MPZL2,MTHFD2,NEDD4L,NFE2L1,NFE2…	118
	Cellular Function and Maintenance	Cellular homeostasis	1.18e-06	Increased	2.291	ABCC3,ABCC9,ABCG1,AKAP1,ANGPTL4,ANO1,AR,ARFGEF3,ATF4,C5,CASP3,CAV1,CDH1,CDK9,CDKN2A,CHRD,CHRM3,CLDN7,COL10A1,CPT1A,CSF1R,DDIT4,DENND3,DHPS,DUSP4,EPHA2,F2RL1,FABP4,FBN2,FEZ2,FKBP4,FZD8,GAA,GADD45B,GLRB,GPR37,IFNAR2,IGFBP3,IGFBP5,IL13RA2,IL1RL1,INHBB,INPP4B,IRS1,ITGA5,ITGB4,ITPKB,JAG1,KCNMA1,KCNN4,KLF2,LAMA3,LCN2,LDHA,LRP5,MAPK13,MBP,MDK,MECOM,MEF2C,MET,MPZL2,NEDD4L,NFE2L1,NLRP3,NMU,NR2C2,NTN4,NUPR…	108
	Cellular Development,Cellular Growth and Proliferation	Proliferation of lung cancer cell lines	1.32e-06	Increased	3.269	ASNS,CASP3,CAV1,CDKN2A,CHRM3,EPHA2,ERBB3,FADS2,FUT8,HMCES,HOXA13,IGFBP3,IRS1,LCN2,MET,MST1R,NFE2L3,NFIB,PARD6A,PIK3C2B,PLS1,PYCR1,RHOB,ROR1,SLC1A5,SLC2A1,SLC3A2,SLC4A7,SOX9,TBXAS1,THBS2,TRIB2,TRIB3,TUBB2A	34
	Cancer,Organismal Injury and Abnormalities,Tumor Morphology	Invasion of carcinoma	3.95e-06	Increased	2.449	AR,CDH1,CDKN2A,ITGA5,ITGA6,ITGB4,MDK,MET,MST1R,SERPINE1,TGFA	11
	Molecular Transport	Transport of molecule	5e-06	Increased	3.881	ABCA13,ABCC3,ABCC9,ABCG1,ACTR1A,ANK3,ANO1,ANO4,ATF4,ATP9A,CAMK2B,CASP3,CAV1,CD44,CDH1,CDKN2A,CFD,CHRM3,CPT1A,CTSS,DENND3,ERBB3,F2RL1,FABP4,FBN2,FKBP4,FOLR3,FZD4,GDF15,GLRB,GSTA4,HAS2,HPS6,HSD17B2,IRS1,KCNMA1,KCNN4,KRT20,LCN2,LRP5,MAP4K4,MBP,MEF2C,MET,MMP12,MYOM1,NEDD4L,NMU,NOX5,P2RX6,PARD6A,PCK2,PFKFB3,PITPNC1,PLTP,PRICKLE1,PSD,PTHLH,PTPN22,RAB26,RAB27B,RHOB,S100A9,SCARA5,SCG5,SCNN1B,SLC14A1,SLC1…	95
	Cancer,Organismal Injury and Abnormalities,Respiratory Disease	Neoplasia of lung cancer cell lines	1.16e-05	Increased	2.359	CAV1,FUT8,MET,MTHFD2,NFE2L3,PARD6A,PAX9,PSAT1,ROR1,SCUBE3,SERPINB4,SOX9,TRIB3	13
	Gastrointestinal Disease,Organismal Injury and Abnormalities	Gastric lesion	1.22e-05	Decreased	-2.219	AADAC,ABCA13,ABCC9,ABCG1,ABHD3,ACBD4,ACSF2,ACTR1A,ADAM15,ADK,AFP,ANK3,ANO1,ANO4,ANXA11,AR,ATF4,ATP9A,BPHL,CAV1,CD44,CDH1,CDH11,CDKN2A,CEP78,CGNL1,CHRD,CHRM3,CMIP,COBL,COL11A1,COL5A1,COL6A3,COL7A1,CRELD2,CSF1R,CST1,CST4,CTPS2,DENND3,DHPS,DIXDC1,DSC2,DSC3,ELFN2,ELOA,EMC10,ENPP4,EPB41L4A-AS1,EPCAM,EPHA2,ERBB3,ETV5,FABP4,FADS2,FAR2,FERMT1,FEZ2,FLNB,GALNT16,GLRB,GPC6,GSTM1,HAS2,HNMT,HPS6,IL1RL1,IMMP2L…	181
	Developmental Disorder,Hereditary Disorder,Organismal Injury and Abnormalities	Familial congenital malformation	1.27e-05	Decreased	-2.184	ABCC3,ABCC9,ABCG1,ALDH1L2,AR,ARHGAP29,ARL6,ASL,B4GAT1,B9D2,BBS1,CA12,CARS1,CAV1,CCND3,CDH1,CDH11,CDH3,CHRD,CHRM3,COL10A1,COL11A1,COL5A1,COL7A1,CSF1R,CSTA,CXADR,CYFIP2,DENND3,DHRS9,DYNLT2B,EBF3,EFNA1,EPHA2,ERBB3,F2RL1,FBN2,FERMT1,FLNB,FXYD5,G0S2,GPC4,GPC6,GSTM1,HOXA13,HPGD,HPS5,HPS6,IARS1,INHBB,IRX2,ITGA6,ITGB4,JAG1,KCNMA1,KRT19,LAMA3,LAMC2,LCN2,LRP5,MACROD1,MAP4K4,MATN2,MECOM,MEF2C,MET,MTHFD2,NED…	96
	Organismal Injury and Abnormalities,Tissue Morphology	Quantity of lesion	1.29e-05	Increased	2.277	CAV1,CCM2,CDH1,CDH3,CDKN2A,CHRM3,CTH,EPCAM,FERMT1,HPGD,JAG1,KCNN4,KLF5,LRP5,MET,MST1R,NFE2L3,ODC1,PRDX2,PTHLH,ROR1,SERPINE1,SULF2,TGFA,TNC	25
	Cellular Movement	Migration of vascular cells	1.66e-05	Increased	2.481	ADAM15,C5,CAV1,CD44,CD9,EFNA1,F2RL1,FLNB,FZD4,HAS2,IGFBP5,ITGB4,KLF2,MDK,PDGFB,PIK3C2B,PTPN6,SERPINE1,SMAD3,SPRY4,THY1,TNFRSF6B,VEGFC	23
	Cellular Movement	Migration of breast cancer cell lines	1.73e-05	Increased	2.658	ADAM15,AR,CAV1,CD44,CD9,CDH1,CDH3,EPHA2,ERBB3,IGFBP3,ITGA6,KRT19,LCN2,LDHA,LMO7,MAP4K4,MET,NET1,NOX5,PPP1R1B,PTHLH,PYCR1,ROR1,SEMA3A,SERPINE1,SFN,SMAD3,SOX17,TFF1,TGFA,TPD52L1	31
	Cardiovascular System Development and Function,Cellular Movement	Movement of vascular endothelial cells	1.84e-05	Increased	2.23	ADAM15,C5,CAV1,CD44,CD9,EFNA1,F2RL1,FLNB,IL1RL1,ITGB4,KLF2,MDK,PIK3C2B,PTPN6,SMAD3,SPRY4,THBS2,THY1,TNFRSF6B,VEGFC	20
	Cancer,Cellular Development,Cellular Growth and Proliferation,Organismal Injury and Abnormalities,Tumor Morphology	Proliferation of carcinoma cells	2.2e-05	Increased	2.425	CDKN2A,IRS1,LAMA3,MET,MST1R,PTHLH,RHOB,TFF3,TGFA	9
	Amino Acid Metabolism,Small Molecule Biochemistry	Synthesis of amino acids	2.32e-05	Increased	2.781	ASL,ASNS,ATF4,CTH,MET,PHGDH,PSAT1,PSPH,PYCR1,SLC38A1,SPTLC3	11
	Cell-To-Cell Signaling and Interaction	Interaction of tumor cells	3.05e-05	Decreased	-2.158	ADAM15,CAV1,CD44,CDH1,EPHA2,IGFBP3,IGFBP5,THY1	8
	Gene Expression	Expression of RNA	4.7e-05	Increased	2.228	ADIRF,AGR2,ANK3,AR,ATF4,CAV1,CCND3,CD44,CD9,CDH1,CDH3,CDK9,CDKN2A,CDKN2B,CEBPG,CSF1R,CSRNP1,CSRNP3,DACH1,DHPS,DIXDC1,DUSP4,EBF3,EFNA1,ELOA,EPCAM,ERBB3,ETV5,F2RL1,FABP4,FERMT1,FUT8,FZD4,GNG2,H1-0,H3C6,HAS3,HES2,HEY1,HMGN5,HOXA13,HOXB13,IFNAR2,IGFBP3,IGFBP5,INHBB,IRS1,IRX2,ITGA6,ITGB1BP1,JAG1,KLF2,KLF5,LCN2,LMO7,LPIN2,LRP5,MAP4K4,MAPRE3,MARS1,MBP,MDK,MECOM,MEF2C,MET,MMP12,MNAT1,MYOM1,NACC2,NFE2L1,N…	117
	Molecular Transport	Secretion of molecule	4.73e-05	Increased	2.519	ABCC3,ABCG1,ANO1,ATP9A,CD44,CDKN2A,CFD,CHRM3,ERBB3,F2RL1,FABP4,FBN2,FZD4,HAS2,HPS6,HSD17B2,KCNN4,KRT20,MEF2C,MYOM1,NMU,PARD6A,PCK2,PFKFB3,PLTP,PTHLH,PTPN22,RAB27B,S100A9,SCG5,SLC2A1,SORL1,STXBP6,TFF2,TGFA,TPD52,UCN2,VEGFC	38
	Cardiovascular System Development and Function,Cellular Movement	Migration of vascular endothelial cells	4.9e-05	Increased	2.242	ADAM15,C5,CAV1,CD44,CD9,EFNA1,F2RL1,FLNB,ITGB4,KLF2,MDK,PIK3C2B,PTPN6,SMAD3,SPRY4,THY1,TNFRSF6B,VEGFC	18
	Cell Death and Survival	Cell viability of tumor cell lines	5.03e-05	Increased	2.772	ABCC3,ADK,AGR2,AR,ASNS,CAMK2B,CARS1,CASP3,CAV1,CCND3,CD44,CDH1,CDKN2A,CLK3,COL5A1,EBNA1BP2,EPHA2,ERBB3,FKBP4,GDF15,GSTM1,GUCY1A1,HEY1,HMCES,IGFBP3,IGFBP5,ITGA6,JAG1,KLF5,KRT19,LCN2,LDHA,LRIG1,MDK,MECOM,MEF2C,MET,MST1R,NFE2L3,NUP210,NUPR1,PCDH18,PCSK1N,PFKFB2,PPP1R1B,PRAME,PRDX2,PRKCH,PTPN22,PTPN6,ROR1,RPS6KA2,S100A9,SCG5,SERPINE1,SFN,SLC1A5,SLC2A1,SLPI,SMAD3,SRGN,TGFA,TP53I3,TPK1,TRIB2,TRPV2,VEGFC	67
	Cellular Development,Cellular Growth and Proliferation,Nervous System Development and Function,Tissue Development	Development of neural cells	5.42e-05	Increased	2.502	ADGRF1,ANK3,AR,BBS1,CAMK1D,CAMK2B,CASP3,CAV1,CD44,CDH1,CDKN2A,COBL,COL4A5,CSF1R,CYFIP2,DDIT4,DIXDC1,EBF3,EFNA1,EMC10,EPHA2,ERBB3,FUT8,FZD4,GPR37,HEY1,IL1RL1,ITGA6,LCN2,MAP4K4,MATN2,MBP,MDK,MEF2C,MET,MYLIP,NEBL,NEDD4L,NFIB,OGT,PALM,PARD6A,PDGFB,PHGDH,PRICKLE1,PSD,PTPN20,RAP2A,RGS2,RHOB,RNF165,ROR1,RTN3,S100A9,SEMA3A,SMAD3,SOX21,SPIRE1,STK38L,SULF2,THBS2,THY1,TNC,TRIM9	64
